# Supplementary material
Source: publisher figshare collection journal article supplement (https://gsajournals.figshare.com/ndownloader/files/21733011)
Supplement: Supplementary file 1 [file 21733011]

**Table S2. RNAi of *ude16* candidate genes does not reverse suppression**

| **Candidate**  **gene** | **RNAi of *ude16*a** |
| --- | --- |
| *smd-1* (control) | 22.1% (n=4367) |
| *viln-1*  *nlp-38*  *viln-1+nlp-38* | 19.3% (n=5830)ns  8.6% (n=3296)ns  27.5% (n=5098)ns |

a Percent of viable progeny from *unc-4(e120) top-2(it7ts)* II; *(ude16)* hermaphrodites fed RNAi bacteria against the gene listed in the first column at 24°C.

n=the number of embryos scored.

ns indicates the data is not significant by the one-tailed student’s T-test. *viln-1*: p=0.41, *nlp-38*: p=0.14, *viln-1*+*nlp-38*: p=0.35.
